# Supplementary material
Source: MDPI journal article supplement (https://www.mdpi.com/2073-445X/10/5/448)
Supplement: s1 [file s1]

**Table S1.** Steps detailing the selection process for the parcels from which we drew the random sample, starting with all parcels in Butler County, Ohio (U.S.A.) as of September 24, 2014. For each step we give the number of parcels (column 2), and the surface area they occupy (column 5). For each of those metrics, we calculate the proportion of parcels the sample represents relative to the original number or square kilometers the parcels cover (columns 4 and 7, respectively – labeled as “% of Original”), as well as the proportion of parcels and their collective surface area relative to the previous step in the selection process (columns 3, and 6, respectively – labeled as “% of Previous”). The parcels considered as exurban properties in our study are those represented in the penultimate row of the table.

| Description                                                          | Number of Parcels | % of Previous | % of Original | Total Area (km <sup>2</sup> ) | % of Previous | % of Original |
|----------------------------------------------------------------------|-------------------|---------------|---------------|-------------------------------|---------------|---------------|
| <b>All parcels in Butler County as of 2014</b>                       | 161,485           | 100.0         | 100.0         | 1,161.0                       | 100.0         | 100.0         |
| <b>Parcels outside incorporated areas</b>                            | 73,391            | 45.4          | 45.4          | 993.5                         | 85.6          | 85.6          |
| <b>Parcels that have a structure on them</b>                         | 54,201            | 73.9          | 33.6          | 544.2                         | 54.8          | 46.9          |
| <b>Parcels that have land use code of Agriculture or Residential</b> | 54,126            | 99.9          | 33.5          | 539.0                         | 99.0          | 46.4          |
| <b>Parcels less than 20 acres</b>                                    | 53,117            | 98.1          | 32.9          | 248.8                         | 46.2          | 21.4          |
| <b>Parcels more than 1 acre (i.e. exurbs)</b>                        | 10,606            | 20.0          | 6.6           | 179.5                         | 72.1          | 15.5          |
| <b>Parcels that have one or more ponds</b>                           | 1,538             | 14.5          | 1.0           | 45.7                          | 25.5          | 3.9           |

**Table S2.** List of interview questions for semi-structured interviews.

|                                                                                                                                                                                                                                                                                                                                                     |
|-----------------------------------------------------------------------------------------------------------------------------------------------------------------------------------------------------------------------------------------------------------------------------------------------------------------------------------------------------|
| <b>Ecosystem Services</b>                                                                                                                                                                                                                                                                                                                           |
| What do you like about living on this plot of land?                                                                                                                                                                                                                                                                                                 |
| Is there anything you dislike about living on this plot of land?                                                                                                                                                                                                                                                                                    |
| For what do you use the land on this property?<br>Only give prompt if needed. For example, vegetable garden, flower garden, fruit trees, bird/wildlife watching, BBQ, recreation (if yes, what type(s) of recreation and is it for you, your children, or pets)?                                                                                    |
| What do you like about having a pond on this property?                                                                                                                                                                                                                                                                                              |
| What do you dislike, if anything?                                                                                                                                                                                                                                                                                                                   |
| For what do you use this pond?<br>Only give prompt if needed. For example, capture water runoff (flood control), filter water, water for well or for animals, fishing, boating, swimming, skating, bird/wildlife watching, just like to look at the water, none/some/all of the above).<br>Have you had any issues with algae, geese, or mosquitos? |
| What are the most enjoyable aspects of managing this property?                                                                                                                                                                                                                                                                                      |
| <b>Land Management</b>                                                                                                                                                                                                                                                                                                                              |
| Have you changed your landscape? No? If yes, how?                                                                                                                                                                                                                                                                                                   |
| Are there areas that you leave unmanaged? USE MAP                                                                                                                                                                                                                                                                                                   |
| Could you describe what steps you take to manage the land on this property?<br>Only give prompt if needed: For example, have you planted/removed any trees, added a garden, removed any invasive species, etc.                                                                                                                                      |
| Ask about fertilizer use, pesticide use, mowing regimen, managing invasives (which invasives and what do you do to manage them)?                                                                                                                                                                                                                    |
| Do you have invasive species on your property? Y or N? If yes, which ones?                                                                                                                                                                                                                                                                          |
| Have you changed the pond or the surrounding area to the pond? No? If yes, how?<br>Only give prompt if needed. Do you mow around the pond? Do you apply any dye to the pond (Crystal Light or Aqua source)?                                                                                                                                         |
| Could you describe what steps you take to manage this pond? Insecticide? Algaecide?                                                                                                                                                                                                                                                                 |
| Does the pond have water in it year round or does it dry up sometimes? Yes, or no?                                                                                                                                                                                                                                                                  |
| Do you stock the pond with fish? No? If yes, why?                                                                                                                                                                                                                                                                                                   |
| How much time do you spend managing this property (including the pond)?                                                                                                                                                                                                                                                                             |
| How satisfied are you with the way this property looks?                                                                                                                                                                                                                                                                                             |

What are the most frustrating aspects of managing this property?

**Miscellaneous**

Since when have you lived here?

Do you own or rent this house?

---

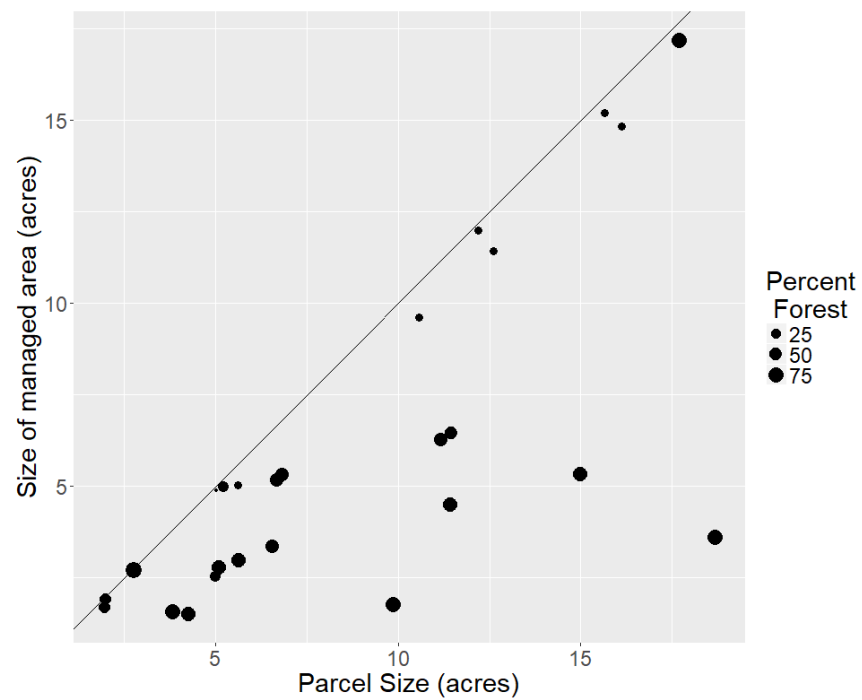

**Figure S1.** Relationship between parcel size (in acres), the size of the area the respondents reported managing on the maps of their parcels, and the proportion of the parcel that is in forest cover (displayed by the size of the circles). The solid black line represents  $y=x$ .

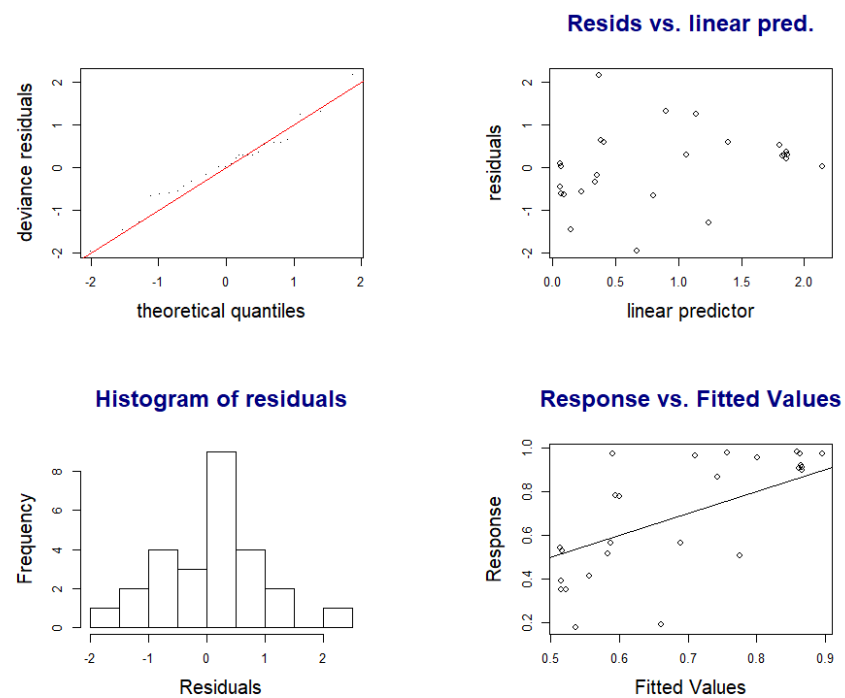

**Figure S2.** Residual plots for the generalized additive model predicting the proportion of the parcel that is managed (response) as a function of a smoothed proportion of the parcel that is in forest cover. Resids stands for residuals and linear pred. stands for linear predictor.
